# Supplementary material for: Consumer Wearable Devices for Activity Monitoring Among Individuals After a Stroke: A Prospective Comparison
Source: PubMed Central journal article supplement (PMC6834221; doi:10.2196/cardio.8199), 2018-01-04

Date: \_\_\_\_\_

Investigator initials: \_\_\_\_\_

## Feasibility questionnaire

*Instructions for administrator: show devices to participant throughout the questionnaire to remind them what each device is when you ask about it.*

### **Part A – consumer device**

Consumer device worn on this day:

- FitBit Charge HR  
 Garmin Vivosmart

1. How comfortable was it for you to wear the **wrist-worn device** during 1 day? *Please choose the best answer.*

|                          |                          |                          |                          |                          |
|--------------------------|--------------------------|--------------------------|--------------------------|--------------------------|
| Not very comfortable     | Not comfortable          | Neutral                  | Somewhat comfortable     | Very comfortable         |
| <input type="checkbox"/> | <input type="checkbox"/> | <input type="checkbox"/> | <input type="checkbox"/> | <input type="checkbox"/> |

2. Did you have any problems wearing the devices?

- No  
 Yes

If Yes, please explain your answer: \_\_\_\_\_  
 \_\_\_\_\_  
 \_\_\_\_\_  
 \_\_\_\_\_

3. These kinds of devices are usually used to measure physical activity over several days. How likely would you be to participate in a study where you had to wear the device every day for 1 week?

|                          |                          |                          |                          |                          |
|--------------------------|--------------------------|--------------------------|--------------------------|--------------------------|
| Very unlikely            | Unlikely                 | Maybe                    | Likely                   | Very likely              |
| <input type="checkbox"/> | <input type="checkbox"/> | <input type="checkbox"/> | <input type="checkbox"/> | <input type="checkbox"/> |

4. Do you think you would have any problems or discomforts with wearing the device every day for a week?

*Please choose the best answer.*

|                          |                          |                          |                          |                          |
|--------------------------|--------------------------|--------------------------|--------------------------|--------------------------|
| Very unlikely            | Unlikely                 | Maybe                    | Likely                   | Very likely              |
| <input type="checkbox"/> | <input type="checkbox"/> | <input type="checkbox"/> | <input type="checkbox"/> | <input type="checkbox"/> |

If you think there might be any problems or discomforts with wearing the devices on the daily basis, please explain your answer: \_\_\_\_\_  
 \_\_\_\_\_  
 \_\_\_\_\_

Date: \_\_\_\_\_

Investigator initials: \_\_\_\_\_

5. Do you think you would have any problems or discomforts sleeping while wearing the device?  
Please choose the best answer.

| Very unlikely            | Unlikely                 | Maybe                    | Likely                   | Very likely              |
|--------------------------|--------------------------|--------------------------|--------------------------|--------------------------|
| <input type="checkbox"/> | <input type="checkbox"/> | <input type="checkbox"/> | <input type="checkbox"/> | <input type="checkbox"/> |

If you think there might be any problems or discomforts with sleeping while wearing the device, please explain your answer: \_\_\_\_\_

\_\_\_\_\_  
\_\_\_\_\_  
\_\_\_\_\_

6. How confident are you that you would be able to put on and take off the **wrist-worn device** on your own if you were given the device to wear at home?  
0= not confident at all; 10 = extremely confident

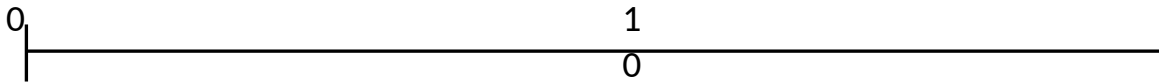

### **Part B**

**Complete on last day only.**

7. How comfortable was it for you to wear the **chest strap** and **accelerometer** during 1 day?  
Please choose the best answer.

|                                           | Not very comfortable     | Not comfortable          | Neutral                  | Somewhat comfortable     | Very comfortable         |
|-------------------------------------------|--------------------------|--------------------------|--------------------------|--------------------------|--------------------------|
| Chest strap for 1 day                     | <input type="checkbox"/> | <input type="checkbox"/> | <input type="checkbox"/> | <input type="checkbox"/> | <input type="checkbox"/> |
| Accelerometer worn at the ankle for 1 day | <input type="checkbox"/> | <input type="checkbox"/> | <input type="checkbox"/> | <input type="checkbox"/> | <input type="checkbox"/> |

8. Did you have any problems wearing the devices?

No

Yes

If Yes, please explain your answer: \_\_\_\_\_

\_\_\_\_\_  
\_\_\_\_\_  
\_\_\_\_\_  
\_\_\_\_\_

Date: \_\_\_\_\_

Investigator initials: \_\_\_\_\_

9. These kinds of devices are usually used to measure physical activity over several days. How likely would you be to participate in a study where you had to wear the:

|                                                  | Very unlikely            | Unlikely                 | Maybe                    | Likely                   | Very likely              |
|--------------------------------------------------|--------------------------|--------------------------|--------------------------|--------------------------|--------------------------|
| Chest strap every day for 1 week?                | <input type="checkbox"/> | <input type="checkbox"/> | <input type="checkbox"/> | <input type="checkbox"/> | <input type="checkbox"/> |
| Accelerometer at the ankle every day for 1 week? | <input type="checkbox"/> | <input type="checkbox"/> | <input type="checkbox"/> | <input type="checkbox"/> | <input type="checkbox"/> |

10. Do you think you would have any problems or discomforts with wearing devices every day for a week?

*Please choose the best answer.*

|                                                  | Very unlikely            | Unlikely                 | Maybe                    | Likely                   | Very likely              |
|--------------------------------------------------|--------------------------|--------------------------|--------------------------|--------------------------|--------------------------|
| Chest strap every day for 1 week?                | <input type="checkbox"/> | <input type="checkbox"/> | <input type="checkbox"/> | <input type="checkbox"/> | <input type="checkbox"/> |
| Accelerometer at the ankle every day for 1 week? | <input type="checkbox"/> | <input type="checkbox"/> | <input type="checkbox"/> | <input type="checkbox"/> | <input type="checkbox"/> |

If you think there might be any problems or discomforts with wearing the devices on the daily basis, please explain your answer: \_\_\_\_\_

\_\_\_\_\_  
 \_\_\_\_\_  
 \_\_\_\_\_

11. How confident are you that you would be able to put on and take off the **chest strap** on your own if you were given the device to wear at home?

0= not confident at all; 10 = extremely confident

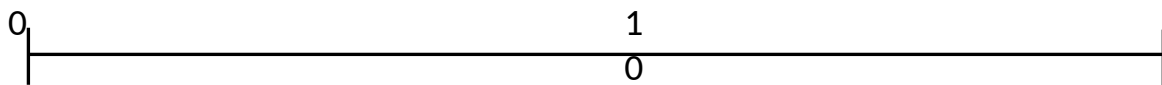

12. How confident are you that you would be able to put on and take off the **accelerometer** on your own if you were given the device to wear at home?

0= not confident at all; 10 = extremely confident

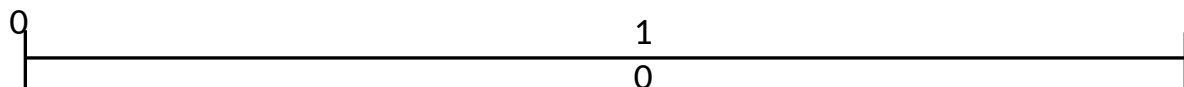

Supplement: cardio_v2i1e1_app1.pdf [file cardio_v2i1e1_app1.pdf]
